# Supplementary material for: Stromal Derived Factor-1 (SDF-1/CXCL12) and CXCR4 in renal cell carcinoma metastasis
Source: Springer Nature journal article supplement (doi:10.1186/1476-4598-5-56), 2006-11-03

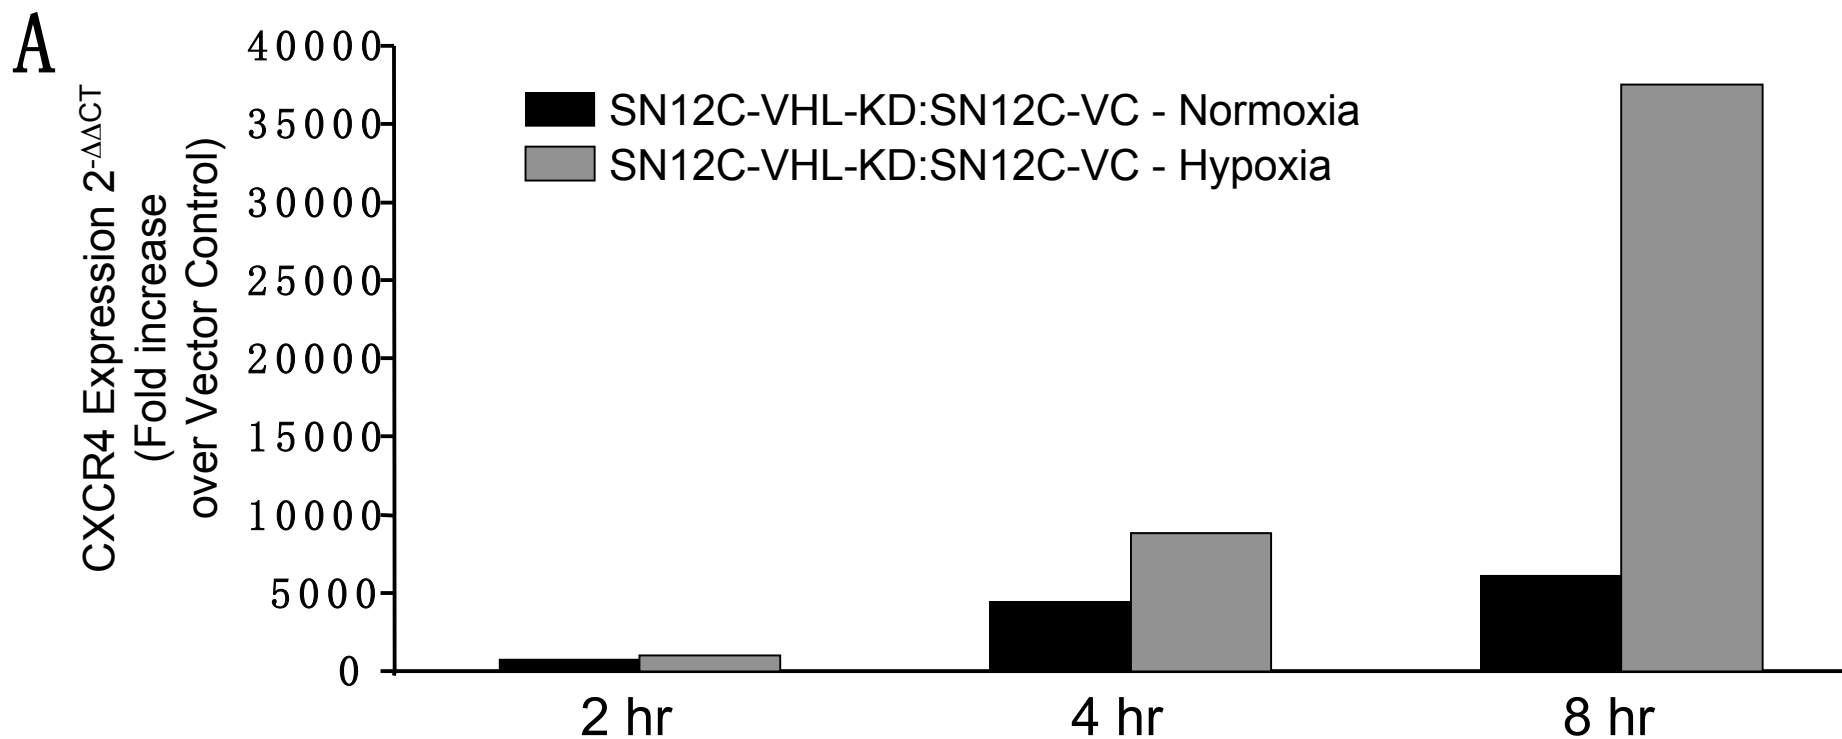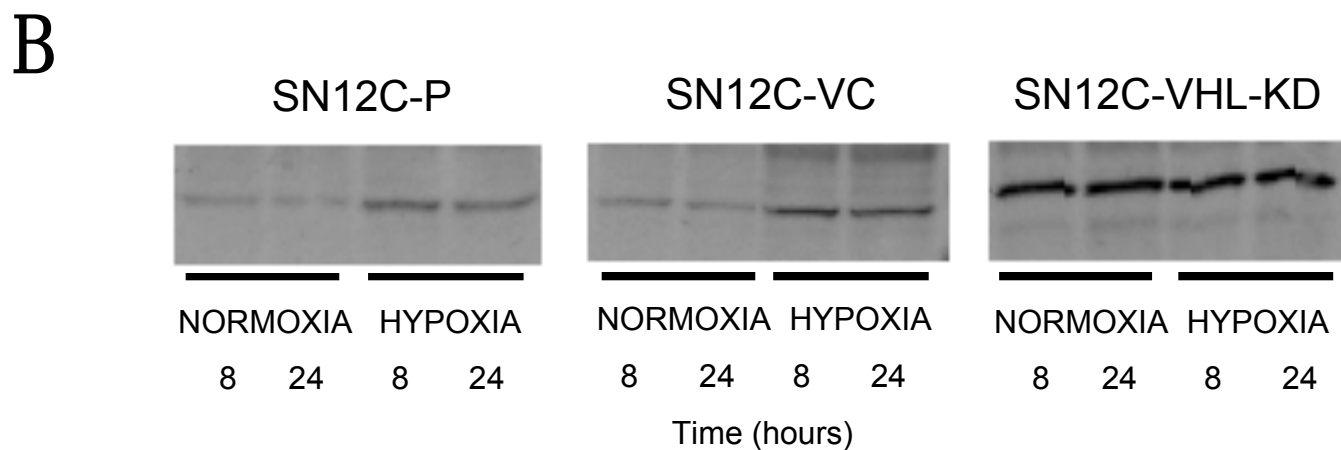

Supplement: 12943_2006_188_MOESM2_ESM.pdf [file 12943_2006_188_MOESM2_ESM.pdf]
