# Supplementary material for: Stromal Derived Factor-1 (SDF-1/CXCL12) and CXCR4 in renal cell carcinoma metastasis
Source: Springer Nature journal article supplement (doi:10.1186/1476-4598-5-56), 2006-11-03
Supplement: 12943_2006_188_MOESM8_ESM.pdf [file 12943_2006_188_MOESM8_ESM.pdf]

**Table 1. RCC tumor-associated angiogenesis (Factor VIII-related antigen), proliferation (PCNA), and apoptosis (TUNEL) in SCID mice treated with anti-CXCL12**

| Group      | FVIIIIRA <sup>A</sup> +/hpf | PCNA+/hpf      | TUNEL+/hpf     |
|------------|-----------------------------|----------------|----------------|
| VC CTRL    | 9.3±1.3                     | 40.4±6.6       | 9.2±1.1        |
| VC αCXCL12 | 6.6±0.8                     | 44.7±3.1       | 6.7±1.0        |
|            | <i>p</i> =0.19              | <i>p</i> =0.60 | <i>p</i> =0.15 |
| KD CTRL    | 26.7±1.4                    | 107.5±4.8      | 28.9±2.5       |
| KD αCXCL12 | 30.1±1.8                    | 116.6±7.6      | 23.4±3.0       |
|            | <i>p</i> =0.13              | <i>p</i> =0.29 | <i>p</i> =0.17 |

Factor VIII-related antigen stained vessels or PCNA or TUNEL stained cells were counted in 5-10 high power fields (hpf; X400) in three sections from each group. <sup>A</sup>FVIIIIRA: Factor VIII-related antigen. CTRL = control serum. αCXCL12 = specific neutralizing anti-CXCL12 serum.
